# Supplementary material
Source: MDPI journal article supplement (https://www.mdpi.com/2297-8747/26/1/7)
Supplement: s1 [file s1]

# PrefShare: a Software for Estimating the Market Share for New Products or Services with a Split Questionnaire Survey

Simone Balmelli and Francesco Moresino

## Abstract

This manual proposes a quick start guide for the software PrefShare. This software permits one to estimate the market share for new products using a split questionnaire survey.

## 1 INTRODUCTION

PrefShare permits one to estimate the market share for new products using a split questionnaire survey. It implements the method proposed by Balmelli and Moresino (2018). The compressed file *Prefshare.zip* distributed with the supplementary materials contains all files needed to run the software.

PrefShare is a free software distributed under the terms of the GNU General Public License as published by the Free Software Foundation (see <http://www.gnu.org/licenses/>). It is distributed without any warranty; without even the implied warranty of merchandability or fitness for a particular purpose.

This manual is organized as follows. Section 2 proposes a quick start guide illustrated with an example whereas Section 3 recapitulates the inputs and outputs of all programs.

## 2 QUICK START GUIDE

PrefShare offers three programs to practitioners who desire to implement the method proposed by Balmelli and Moresino (2018). The first program permits one to design the questionnaire, the second one computes the coefficient of the logistic regression from the results of the survey and finally the third one computes the share of preference from the logistic regression. These programs are written in the language Octave, one of the free alternative to Matlab.

These three programs can be found in the supplementary materials accompanying the article Balmelli and Moresino (2018). The directory *PrefShare* contains four folders: the three programs are located in the folder *run\_program*, the input and output data are placed in the folders *input* and *output*, finally the folder *functions* contains the library of functions used by the programs.

### 2.1 Experimental design

Given the salient attributes envisaged in the preliminary product analysis, the desired number of profiles to be addressed to each respondent and the desired number of respondent to be interviewed, the program *Experimental\_design.m* computes two files. The first file provides

a  $D$ -optimal basis, that consists of the list of profiles retained for the survey. The second file contains the attribution matrix, which is the list of profiles to be addressed to each respondent.

To illustrate how this program functions, let us take a  $4 \times 3^4 \times 2^3$  factorial example. To run the program, we must open the file *Experimental\_design.m* with the software Octave and then, in the tab "Editor", click on the icon "Save File and Run" (see Figure 1a). Alternately, we can run the command "Experimental\_design" in the tab "Command Window" (see Figure 1b). Then, a first dialog box appears (see Figure 2a). If we chose the option "Use the default settings", the program will use the default settings highlighted in blue in Figure 1c and no other dialog boxes are needed. We must notice that, in this case,  $v$  must be a divisor of  $kb$ . If we choose the option "Enter new settings", we will have to enter data manually. A dialog box will ask us to enter the number of levels for each attributes (see Figure 2b). In our example with the  $4 \times 3^4 \times 2^3$  factorial example, we have eight attributes, the first one has 4 levels, the four following ones 3 attributes and the three last ones 2 attributes. Afterwards, we must enter the number of competition's profiles; for our example we chose 2 (see Figure 2c). Subsequently, we have to enter the design for each competition's profile, *i.e.* the attribute level for each attribute. Obviously, the level of each attribute must be between 1 and the number of levels of the considered attribute. In our example, the first profile has the minimal level for each attributes, whereas the second one the maximal level for each attribute (see Figures 2d-2e). Then, we are asked if we wish to impose a limit for the number of different profiles in the basis (see Figure 2f). Let us recall that the best results are obtained when the number of different profiles in the basis is as big as possible. However, for logistical reasons, it is sometimes more convenient to impose a limit on this number. In our example, we choose not to put a limit. Then, we have to enter the desired number of respondents and the desired number of card that will be addressed to each respondent. In our example, we wish to interview 300 respondents and present to each of them 10 profiles (see Figure 2g). At this point, let us recall that balanced designs are optimal, but not all combinations of parameters give a balanced design. For this reason, the program propose a balanced design that gives the best compromise with the wish of the user. In our example, the program proposes us to interview 287 respondents and present each of them 9 profiles (see Figure 2h). Suppose that we absolutely wanted 10 profiles. In this case, we have the possibility to change the importance weights of the parameters. In our example, we give to the number of profiles a huge weight (99 in this case) to force the program to find a solution where the number of profiles matches our wish (see Figure 2i). With these new weights, the program proposes us to interview 259 respondents and present each of them 10 profiles (see Figure 2j). We accept this proposition and, finally, we are asked to give the number of independent tries the program will use to compute the  $D$ -optimal basis (see Figure 2k). Let us recall that, unless trying all possibilities, which is obviously not possible for most real cases, it is necessary to use a heuristic to compute the  $D$ -optimal basis. For each try, the heuristic will randomly select a starting point. Obviously, the higher the number of tries, the better the optimal basis and the higher the computational time. Based on our observations, we recommend to use a value of 100 for the number of tries.

The program will then write three files in the folder *output*. The first file, named *D\_basis.csv*, provides a  $D$ -optimal basis, that consists of the list of profiles retained for the survey (see Figure 3a). In this figure, we can see the 23 first profiles of the basis that contains, in our example, 2590 profiles. The second file is named *questionnaire\_split.csv* and contains the attribution matrix, which is the list of profiles to be addressed to each respondent (see Figure 3b). In this figure, we can see the attributions for the 23 first respondents. Let us recall that in our example, there are 259 respondents and each of them will be present 10 profiles. Each line represents a respondent and contains the information of the 10 profiles (named cards in this

file) that will be presented to her. Finally, a third file, named *parameters.csv*, is also saved in the folder *output*. This last file contains the parameters of the problem and is used by the two other programs (*Logistic\_regression.m* and *Preference\_share.m*) as input data.

## 2.2 Logistic regression

Given the matrix of preferences revealed through the survey, the program *Logistic\_regression.m* computes the coefficient of the logistic regression estimating the market share in function of the product profile. The input preferences matrix has the same structure as the attribution matrix. Concretely, if the respondent has preferred a given profile to the best competitor profile, the corresponding element of the matrix is filled with 1 and with 0 otherwise. The program provides a file containing the coefficient of the logistic regression.

To illustrate how this program functions, let us take again our  $4 \times 3^4 \times 2^3$  factorial example. This program requires four input files. Three of them, namely *D\_basis.csv*, *questionnaire\_split.csv* and *parameters.csv*, are the outputs of the previous step and must stay in the folder *output*. The fourth one, namely *preference\_data.csv*, must be placed in the folder *input*. This file contains the preferences matrix revealed with the survey and has the same structure as the attribution matrix contained in the file *questionnaire\_split.csv*. Concretely, if the respondent has preferred a given profile (card) to the best competitor profile, the corresponding element of the matrix is filled with 1 and with 0 otherwise. In Figure 4a, we can see the choices of the 24 first respondents. We can see, for instance, that respondent 2 has preferred the third profile to the competition. Once the input files are ready, we can run the program *Logistic\_regression.m*. Similarly as in the previous section, using the Octave environment, we can either run the program in one click or with a command line. In this last case, the command "Logistic\_regression" must be run in the the tab "Command Window". The program will write in the folder *output* the file *regression\_coefficients.csv* (see Figure 4b). This files contains the regressions coefficients of the logistic regression estimating the market shares. Note that we used a classical coding scheme, where for each attribute one level is removed in order to avoid collinearity. This file is used as input data for the next step.

## 2.3 Estimation of the market share

Finally, given the coefficient of the logistic regression, the program *Preference\_share.m* computes the share of preference for any product profiles we want to study.

To illustrate how this program functions, let us take again our  $4 \times 3^4 \times 2^3$  factorial example. This program requires three input files. Two of them, namely *regression\_coefficients.csv* and *parameters.csv*, are the outputs of the previous steps and must stay in the folder *output*. The third one, named *profiles.csv*, contains the different profiles that we want to study (see Figure 5a). The columns of this file are the same as the columns of the file *D\_basis.csv*, except that the first one has been removed. In our example, we have eight columns representing the eight attributes, and, as we decided to study four different profiles, we have four lines. Similarly as in the previous sections, using the Octave environment, we can either run the program in one click or with a command line. In this last case, the command "Preference\_share" must be run in the the tab "Command Window". The program will write in the folder *output* the file *preference\_share.csv*. This file contains the different profiles as defined in the input data with the corresponding estimation of the market share (see Figure 5b). We can see, for instance, that the market share of the third profile would be 41%.

### 3 INPUTS-OUTPUTS AT A GLANCE

This section proposes a recapitulation of the inputs and outputs for the three programs, namely *Experimental\_design.m*, *Logistic\_regression.m* and *Preference\_share.m*. All output files are written in the folder *output* whereas all input files must be placed in the the folder *input*.

#### 3.1 *Experimental\_design.m*

For this program, the input data has to be entered as parameters either using the dialog boxes provided by the program or by writing the data directly in the program.

**Input file:** none.

**Parameters:**

number of levels for each attribute,  
number of respondents,  
number of cards per respondent,  
number of regression design profiles,  
concurrence profiles,  
number of independent tries for the algorithm.

**Output files:** *D\_basis.csv*, *questionnaire\_split.csv* and *parameters.csv*.

#### 3.2 *Logistic\_regression.m*

Before running this program, we must have run the program *Experimental\_design.m*. In particular, the three files *D\_basis.csv*, *questionnaire\_split.csv* and *parameters.csv* must be in the folder *output*.

**Input file:** *preference\_data.csv*.

**Parameters:** none.

**Output file:** *regression\_coefficients.csv*.

#### 3.3 *Preference\_share.m*

Before running this program, we must have run both the programs *Experimental\_design.m* and *Logistic\_regression.m*. In particular, the two files *regression\_coefficients.csv* and *parameters.csv* must be in the folder *output*.

**Input file:** *profiles.csv*

**Parameters:** none.

**Output file:** *preference\_share.csv*.

### REFERENCES

Balmelli, Simone and Francesco Moresino. 2020. “Estimating the Market Share for New Products With a Split Questionnaire Survey.” Submitted.

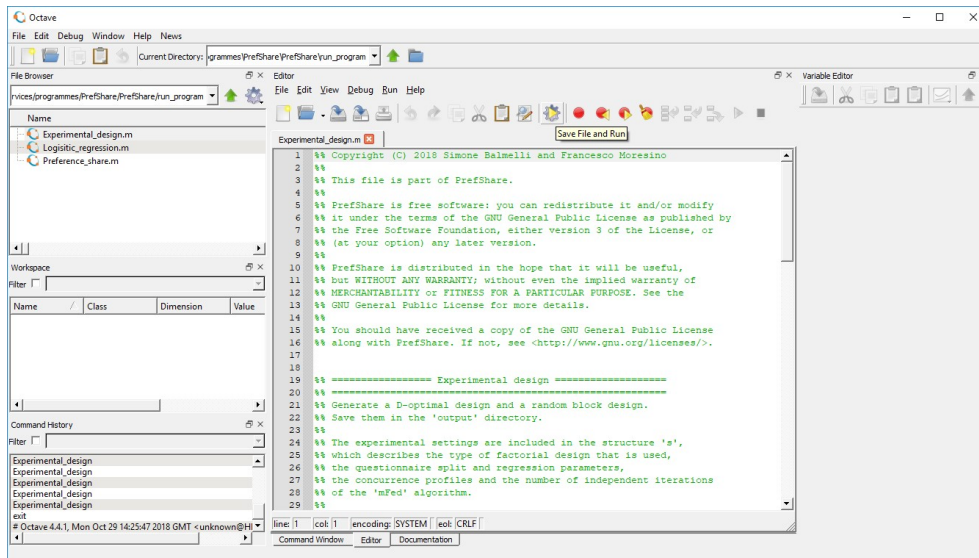

(a) Running the program in one click.

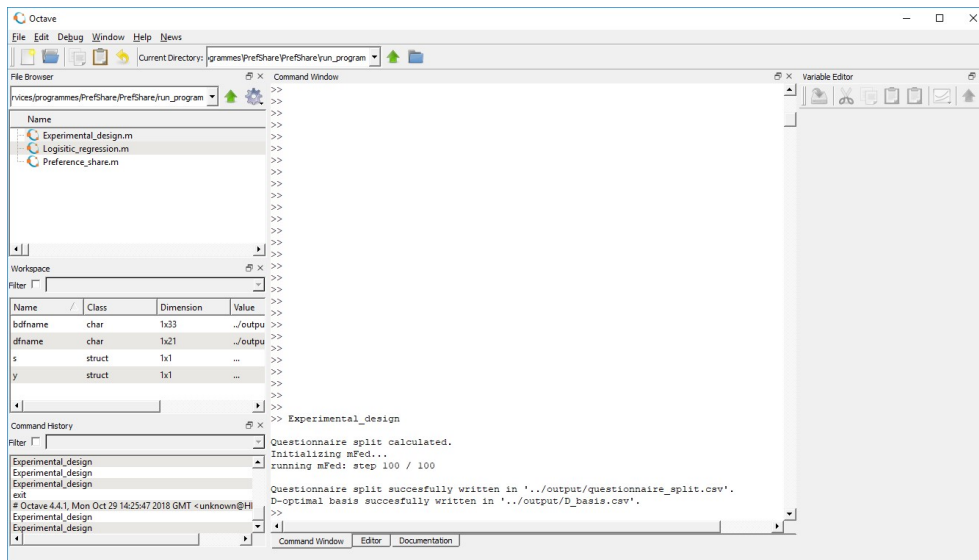

(b) Running the program with a command.

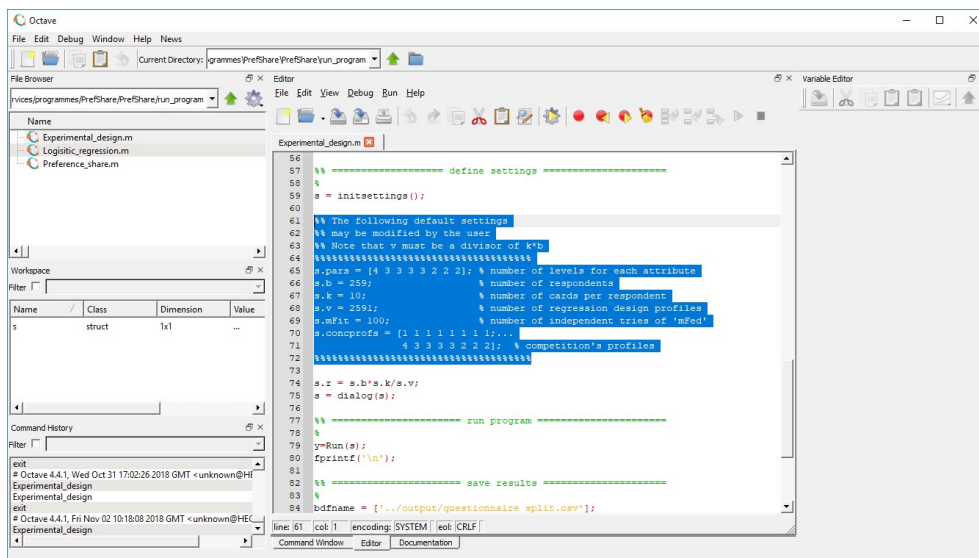

(c) Default data that can be changed by the user.

Figure 1: Octave's environment for the program *Experimental\_design.m*.

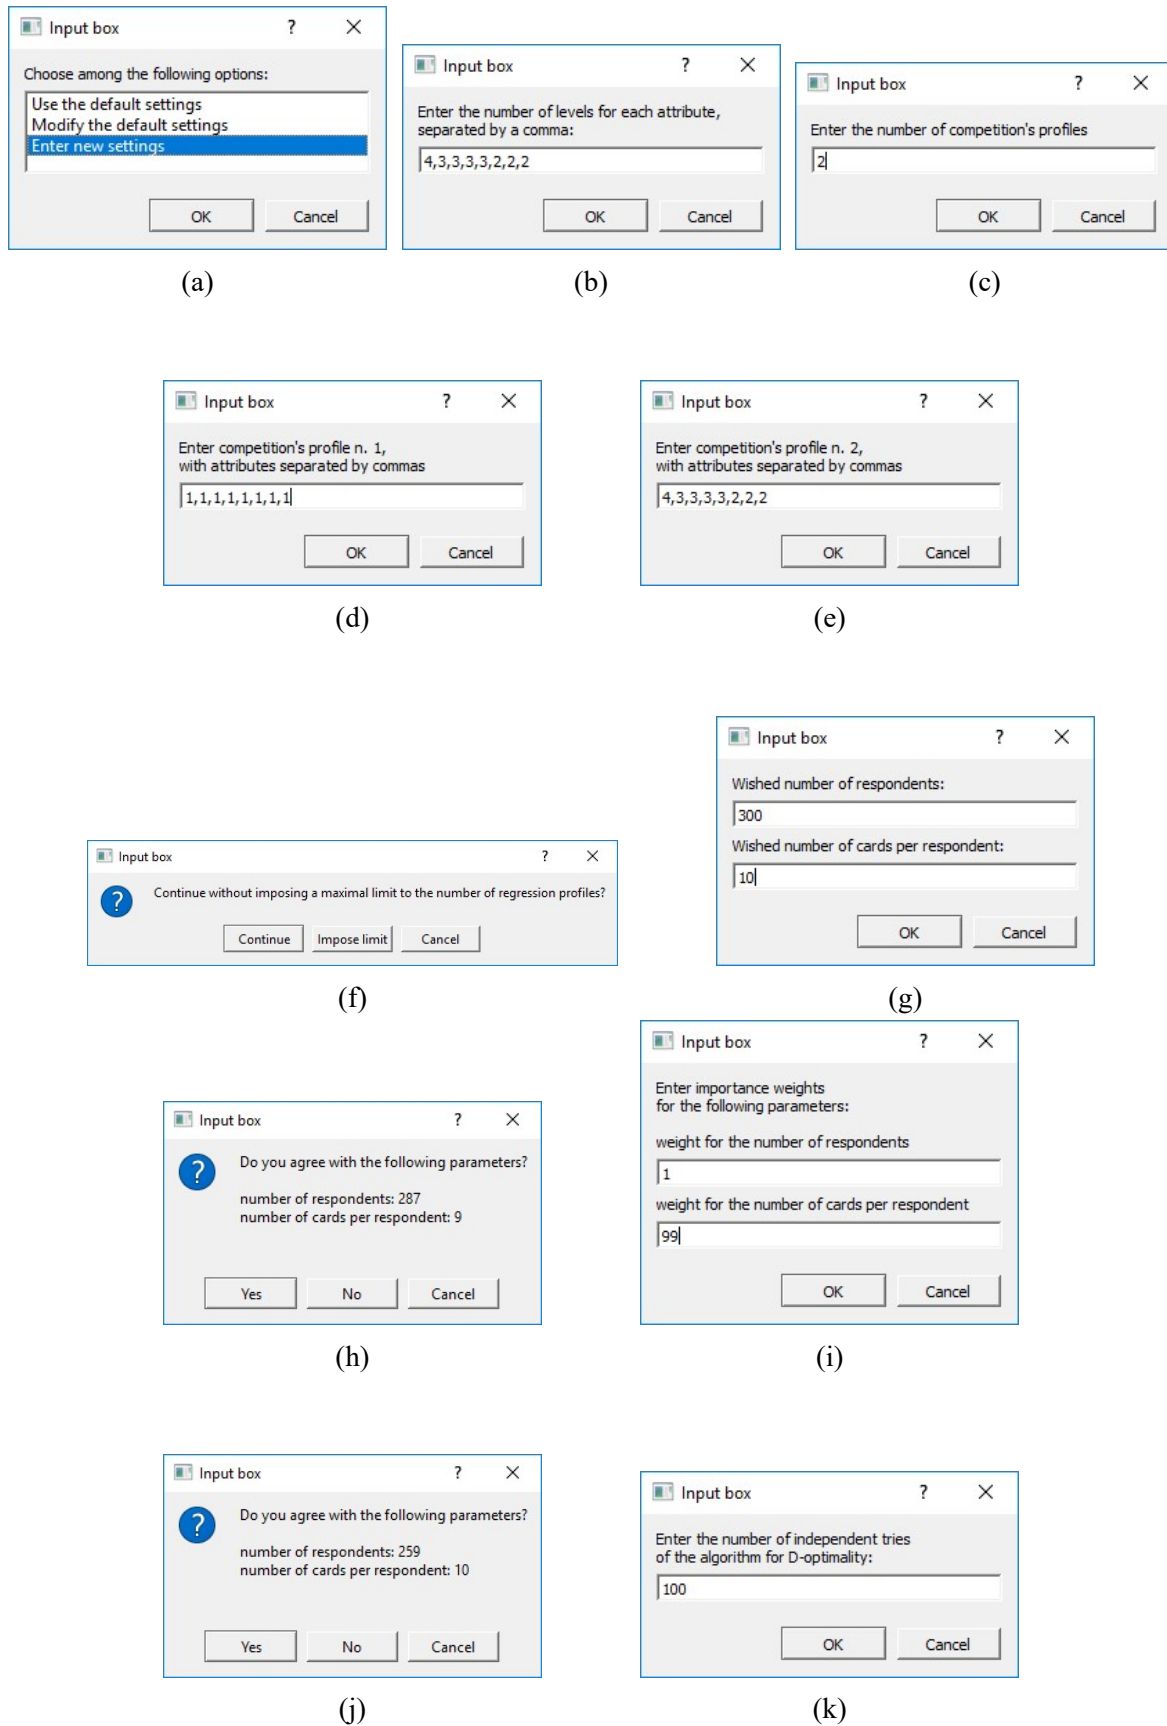

Figure 2: Dialog boxes for the program *Experimental\_design.m*.

D\_basis.csv - Excel

|    | A       | B          | C          | D          | E          | F          | G          | H          | I          | J | K | L |
|----|---------|------------|------------|------------|------------|------------|------------|------------|------------|---|---|---|
| 1  | profile | attribute1 | attribute2 | attribute3 | attribute4 | attribute5 | attribute6 | attribute7 | attribute8 |   |   |   |
| 2  | 1       | 1          | 1          | 1          | 1          | 1          | 1          | 1          | 2          |   |   |   |
| 3  | 2       | 1          | 1          | 1          | 1          | 1          | 1          | 1          | 2          | 1 |   |   |
| 4  | 3       | 1          | 1          | 1          | 1          | 1          | 1          | 2          | 2          |   |   |   |
| 5  | 4       | 1          | 1          | 1          | 1          | 1          | 2          | 1          | 1          |   |   |   |
| 6  | 5       | 1          | 1          | 1          | 1          | 1          | 2          | 1          | 2          |   |   |   |
| 7  | 6       | 1          | 1          | 1          | 1          | 1          | 2          | 2          | 1          |   |   |   |
| 8  | 7       | 1          | 1          | 1          | 1          | 1          | 2          | 2          | 2          |   |   |   |
| 9  | 8       | 1          | 1          | 1          | 1          | 2          | 1          | 1          | 1          |   |   |   |
| 10 | 9       | 1          | 1          | 1          | 1          | 2          | 1          | 1          | 2          |   |   |   |
| 11 | 10      | 1          | 1          | 1          | 1          | 2          | 1          | 2          | 1          |   |   |   |
| 12 | 11      | 1          | 1          | 1          | 1          | 2          | 1          | 2          | 2          |   |   |   |
| 13 | 12      | 1          | 1          | 1          | 1          | 2          | 2          | 1          | 1          |   |   |   |
| 14 | 13      | 1          | 1          | 1          | 1          | 2          | 2          | 1          | 2          |   |   |   |
| 15 | 14      | 1          | 1          | 1          | 1          | 2          | 2          | 2          | 1          |   |   |   |
| 16 | 15      | 1          | 1          | 1          | 1          | 2          | 2          | 2          | 2          |   |   |   |
| 17 | 16      | 1          | 1          | 1          | 1          | 3          | 1          | 1          | 1          |   |   |   |
| 18 | 17      | 1          | 1          | 1          | 1          | 3          | 1          | 1          | 2          |   |   |   |
| 19 | 18      | 1          | 1          | 1          | 1          | 3          | 1          | 2          | 1          |   |   |   |
| 20 | 19      | 1          | 1          | 1          | 1          | 3          | 1          | 2          | 2          |   |   |   |
| 21 | 20      | 1          | 1          | 1          | 1          | 3          | 2          | 1          | 1          |   |   |   |
| 22 | 21      | 1          | 1          | 1          | 1          | 3          | 2          | 1          | 2          |   |   |   |
| 23 | 22      | 1          | 1          | 1          | 1          | 3          | 2          | 2          | 1          |   |   |   |
| 24 | 23      | 1          | 1          | 1          | 1          | 3          | 2          | 2          | 2          |   |   |   |

(a) The file *D\_basis.csv*.

questionnaire\_split.csv - Excel

|    | A          | B     | C     | D     | E     | F     | G     | H     | I     | J     | K      | L |
|----|------------|-------|-------|-------|-------|-------|-------|-------|-------|-------|--------|---|
| 1  | respondent | card1 | card2 | card3 | card4 | card5 | card6 | card7 | card8 | card9 | card10 |   |
| 2  | 1          | 368   | 653   | 690   | 950   | 1263  | 1435  | 1539  | 1592  | 1884  | 1938   |   |
| 3  | 2          | 45    | 328   | 931   | 1120  | 1144  | 1256  | 1449  | 1727  | 1861  | 1906   |   |
| 4  | 3          | 64    | 172   | 227   | 649   | 771   | 899   | 1114  | 1360  | 1867  | 1993   |   |
| 5  | 4          | 185   | 598   | 698   | 755   | 2147  | 2229  | 2432  | 2440  | 2443  | 2488   |   |
| 6  | 5          | 10    | 50    | 326   | 593   | 742   | 804   | 1030  | 1791  | 1919  | 2066   |   |
| 7  | 6          | 101   | 269   | 327   | 2086  | 2233  | 2348  | 2383  | 2490  | 2570  | 2572   |   |
| 8  | 7          | 336   | 467   | 553   | 717   | 893   | 1115  | 1292  | 1423  | 1485  | 2236   |   |
| 9  | 8          | 174   | 635   | 708   | 1173  | 1407  | 1664  | 1856  | 2074  | 2312  | 2441   |   |
| 10 | 9          | 203   | 792   | 898   | 904   | 1001  | 1321  | 1355  | 1858  | 1989  | 2182   |   |
| 11 | 10         | 305   | 499   | 512   | 633   | 873   | 1014  | 1044  | 1124  | 1146  | 1229   |   |
| 12 | 11         | 111   | 373   | 488   | 503   | 576   | 677   | 1234  | 1336  | 1675  | 1814   |   |
| 13 | 12         | 97    | 505   | 592   | 616   | 1805  | 1838  | 2143  | 2214  | 2366  | 2461   |   |
| 14 | 13         | 70    | 391   | 843   | 869   | 1079  | 1808  | 1830  | 1918  | 1974  | 2172   |   |
| 15 | 14         | 106   | 697   | 722   | 1109  | 1380  | 1431  | 1448  | 1712  | 2138  | 2382   |   |
| 16 | 15         | 173   | 320   | 460   | 579   | 1222  | 1889  | 2266  | 2285  | 2318  | 2384   |   |
| 17 | 16         | 682   | 1397  | 2467  | 2483  | 2513  | 2530  | 2559  | 2560  | 2566  | 2567   |   |
| 18 | 17         | 131   | 183   | 273   | 322   | 353   | 376   | 640   | 1143  | 1388  | 1501   |   |
| 19 | 18         | 73    | 330   | 387   | 519   | 678   | 1196  | 1266  | 1464  | 1534  | 2206   |   |
| 20 | 19         | 18    | 109   | 233   | 566   | 608   | 877   | 901   | 1200  | 1319  | 1715   |   |
| 21 | 20         | 133   | 163   | 207   | 211   | 296   | 632   | 875   | 880   | 1021  | 1100   |   |
| 22 | 21         | 259   | 405   | 628   | 665   | 958   | 967   | 974   | 1066  | 1478  | 1740   |   |
| 23 | 22         | 313   | 463   | 764   | 818   | 938   | 1210  | 1235  | 1400  | 1569  | 1921   |   |
| 24 | 23         | 49    | 756   | 1118  | 1298  | 1834  | 1874  | 2015  | 2361  | 2363  | 2375   |   |

(b) The file *questionnaire\_split.csv*.Figure 3: Output files of the program *Experimental\_design.m*.



preference\_data.csv - Excel

Formules   Données   Révision   Affichage   Développeur   Acrobat   Recherche   Connexion   Partager

Calibri 11

Standard

Mise en forme conditionnelle   Insérer   Σ

Mettre sous forme de tableau   Supprimer   %

Styles de cellules   Format   0,00

Cellules   Édition

A1   X   ✓   f   x   respondent

|    | A          | B     | C     | D     | E     | F     | G     | H     | I     | J     | K      | L |
|----|------------|-------|-------|-------|-------|-------|-------|-------|-------|-------|--------|---|
|    | respondent | card1 | card2 | card3 | card4 | card5 | card6 | card7 | card8 | card9 | card10 |   |
| 1  | 1          | 0     | 0     | 1     | 1     | 1     | 0     | 1     | 1     | 0     | 1      |   |
| 2  | 2          | 1     | 0     | 1     | 1     | 1     | 1     | 1     | 1     | 1     | 0      |   |
| 3  | 3          | 0     | 0     | 0     | 1     | 1     | 0     | 0     | 1     | 1     | 1      |   |
| 4  | 4          | 1     | 1     | 0     | 1     | 0     | 1     | 0     | 1     | 1     | 0      |   |
| 5  | 5          | 1     | 1     | 1     | 1     | 0     | 1     | 1     | 0     | 0     | 1      |   |
| 6  | 6          | 0     | 0     | 1     | 0     | 1     | 1     | 0     | 1     | 0     | 1      |   |
| 7  | 7          | 0     | 1     | 1     | 1     | 0     | 1     | 1     | 1     | 0     | 1      |   |
| 8  | 8          | 0     | 0     | 1     | 1     | 1     | 0     | 0     | 0     | 1     | 0      |   |
| 9  | 9          | 0     | 0     | 1     | 1     | 1     | 1     | 1     | 0     | 0     | 0      |   |
| 10 | 10         | 0     | 1     | 0     | 1     | 0     | 1     | 1     | 1     | 0     | 0      |   |
| 11 | 11         | 1     | 0     | 1     | 0     | 1     | 0     | 1     | 0     | 1     | 0      |   |
| 12 | 12         | 0     | 0     | 0     | 1     | 0     | 1     | 0     | 1     | 1     | 0      |   |
| 13 | 13         | 0     | 1     | 1     | 1     | 0     | 1     | 1     | 0     | 0     | 0      |   |
| 14 | 14         | 0     | 0     | 0     | 1     | 1     | 1     | 0     | 0     | 0     | 1      |   |
| 15 | 15         | 1     | 0     | 0     | 0     | 0     | 1     | 0     | 0     | 0     | 1      |   |
| 16 | 16         | 0     | 1     | 0     | 0     | 1     | 1     | 1     | 0     | 0     | 0      |   |
| 17 | 17         | 1     | 1     | 0     | 1     | 1     | 0     | 0     | 0     | 0     | 1      |   |
| 18 | 18         | 0     | 1     | 0     | 0     | 0     | 0     | 0     | 0     | 1     | 1      |   |
| 19 | 19         | 0     | 0     | 1     | 1     | 0     | 0     | 0     | 1     | 0     | 0      |   |
| 20 | 20         | 0     | 0     | 1     | 1     | 0     | 0     | 0     | 1     | 0     | 0      |   |
| 21 | 21         | 0     | 1     | 0     | 1     | 0     | 1     | 1     | 1     | 0     | 1      |   |
| 22 | 22         | 0     | 0     | 0     | 1     | 1     | 1     | 0     | 0     | 0     | 0      |   |
| 23 | 23         | 1     | 0     | 0     | 1     | 0     | 0     | 0     | 0     | 0     | 0      |   |

preference\_data

Prêt

(a) The file *preference\_data.csv*.

regression\_coefficients.csv - Excel

Formules   Données   Révision   Affichage   Développeur   Acrobat   Recherche   Connexion   Partager

Calibri 11

Standard

Mise en forme conditionnelle   Insérer   Σ

Mettre sous forme de tableau   Supprimer   %

Styles de cellules   Format   0,00

Cellules   Édition

A1   X   ✓   f   x   intercept\_term

|    | A                | B         | C | D | E | F | G | H | I | J | K |
|----|------------------|-----------|---|---|---|---|---|---|---|---|---|
| 1  | intercept_term   | -0.257925 |   |   |   |   |   |   |   |   |   |
| 2  | attribute1level2 | 0.107914  |   |   |   |   |   |   |   |   |   |
| 3  | attribute1level3 | 0.114149  |   |   |   |   |   |   |   |   |   |
| 4  | attribute1level4 | 0.111268  |   |   |   |   |   |   |   |   |   |
| 5  | attribute2level2 | -0.030247 |   |   |   |   |   |   |   |   |   |
| 6  | attribute2level3 | 0.013933  |   |   |   |   |   |   |   |   |   |
| 7  | attribute3level2 | 0.011714  |   |   |   |   |   |   |   |   |   |
| 8  | attribute3level3 | 0.083644  |   |   |   |   |   |   |   |   |   |
| 9  | attribute4level2 | 0.151086  |   |   |   |   |   |   |   |   |   |
| 10 | attribute4level3 | 0.181336  |   |   |   |   |   |   |   |   |   |
| 11 | attribute5level2 | 0.053259  |   |   |   |   |   |   |   |   |   |
| 12 | attribute5level3 | 0.000227  |   |   |   |   |   |   |   |   |   |
| 13 | attribute6level2 | -0.063951 |   |   |   |   |   |   |   |   |   |
| 14 | attribute7level2 | 0.079507  |   |   |   |   |   |   |   |   |   |
| 15 | attribute8level2 | -0.001571 |   |   |   |   |   |   |   |   |   |
| 16 |                  |           |   |   |   |   |   |   |   |   |   |
| 17 |                  |           |   |   |   |   |   |   |   |   |   |
| 18 |                  |           |   |   |   |   |   |   |   |   |   |
| 19 |                  |           |   |   |   |   |   |   |   |   |   |
| 20 |                  |           |   |   |   |   |   |   |   |   |   |
| 21 |                  |           |   |   |   |   |   |   |   |   |   |
| 22 |                  |           |   |   |   |   |   |   |   |   |   |
| 23 |                  |           |   |   |   |   |   |   |   |   |   |
| 24 |                  |           |   |   |   |   |   |   |   |   |   |

regression\_coefficients

Prêt

(b) The file *regression\_coefficients.csv*.Figure 4: Input and output files for the program *Logistic\_regression.m*.



profiles.csv - Excel

|    | A          | B          | C          | D          | E          | F          | G          | H          | I | J | K | L |
|----|------------|------------|------------|------------|------------|------------|------------|------------|---|---|---|---|
| 1  | attribute1 | attribute2 | attribute3 | attribute4 | attribute5 | attribute6 | attribute7 | attribute8 |   |   |   |   |
| 2  | 2          | 1          | 1          | 1          | 2          | 2          | 2          | 2          |   |   |   |   |
| 3  | 4          | 3          | 3          | 3          | 3          | 2          | 2          | 2          |   |   |   |   |
| 4  | 1          | 2          | 1          | 1          | 1          | 2          | 1          | 2          |   |   |   |   |
| 5  | 3          | 3          | 3          | 3          | 2          | 1          | 2          | 1          |   |   |   |   |
| 6  |            |            |            |            |            |            |            |            |   |   |   |   |
| 7  |            |            |            |            |            |            |            |            |   |   |   |   |
| 8  |            |            |            |            |            |            |            |            |   |   |   |   |
| 9  |            |            |            |            |            |            |            |            |   |   |   |   |
| 10 |            |            |            |            |            |            |            |            |   |   |   |   |
| 11 |            |            |            |            |            |            |            |            |   |   |   |   |
| 12 |            |            |            |            |            |            |            |            |   |   |   |   |
| 13 |            |            |            |            |            |            |            |            |   |   |   |   |
| 14 |            |            |            |            |            |            |            |            |   |   |   |   |
| 15 |            |            |            |            |            |            |            |            |   |   |   |   |
| 16 |            |            |            |            |            |            |            |            |   |   |   |   |
| 17 |            |            |            |            |            |            |            |            |   |   |   |   |
| 18 |            |            |            |            |            |            |            |            |   |   |   |   |
| 19 |            |            |            |            |            |            |            |            |   |   |   |   |
| 20 |            |            |            |            |            |            |            |            |   |   |   |   |
| 21 |            |            |            |            |            |            |            |            |   |   |   |   |
| 22 |            |            |            |            |            |            |            |            |   |   |   |   |
| 23 |            |            |            |            |            |            |            |            |   |   |   |   |
| 24 |            |            |            |            |            |            |            |            |   |   |   |   |

(a) The file *profiles.csv*.

preference\_share.csv - Excel

|    | A          | B          | C          | D          | E          | F          | G          | H          | I                | J | K |
|----|------------|------------|------------|------------|------------|------------|------------|------------|------------------|---|---|
| 1  | attribute1 | attribute2 | attribute3 | attribute4 | attribute5 | attribute6 | attribute7 | attribute8 | preference_share |   |   |
| 2  | 2          | 1          | 1          | 1          | 2          | 2          | 2          | 2          | 0.47932          |   |   |
| 3  | 4          | 3          | 3          | 3          | 3          | 2          | 2          | 2          | 0.536552         |   |   |
| 4  | 1          | 2          | 1          | 1          | 1          | 2          | 1          | 2          | 0.412487         |   |   |
| 5  | 3          | 3          | 3          | 3          | 2          | 1          | 2          | 1          | 0.566578         |   |   |
| 6  |            |            |            |            |            |            |            |            |                  |   |   |
| 7  |            |            |            |            |            |            |            |            |                  |   |   |
| 8  |            |            |            |            |            |            |            |            |                  |   |   |
| 9  |            |            |            |            |            |            |            |            |                  |   |   |
| 10 |            |            |            |            |            |            |            |            |                  |   |   |
| 11 |            |            |            |            |            |            |            |            |                  |   |   |
| 12 |            |            |            |            |            |            |            |            |                  |   |   |
| 13 |            |            |            |            |            |            |            |            |                  |   |   |
| 14 |            |            |            |            |            |            |            |            |                  |   |   |
| 15 |            |            |            |            |            |            |            |            |                  |   |   |
| 16 |            |            |            |            |            |            |            |            |                  |   |   |
| 17 |            |            |            |            |            |            |            |            |                  |   |   |
| 18 |            |            |            |            |            |            |            |            |                  |   |   |
| 19 |            |            |            |            |            |            |            |            |                  |   |   |
| 20 |            |            |            |            |            |            |            |            |                  |   |   |
| 21 |            |            |            |            |            |            |            |            |                  |   |   |
| 22 |            |            |            |            |            |            |            |            |                  |   |   |
| 23 |            |            |            |            |            |            |            |            |                  |   |   |
| 24 |            |            |            |            |            |            |            |            |                  |   |   |

(b) The file *preference\_share.csv*.Figure 5: Input and output files for the program *Preference\_share.m*.
